# Supplementary material for: Amelioration of cancer cachexia with preemptive administration of tumor necrosis factor-α blocker
Source: PubMed Central journal article supplement — J Clin Biochem Nutr. 2021 Oct 19;70(2):117–28. doi: 10.3164/jcbn.21-21 (PMC8921719; doi:10.3164/jcbn.21-21), 2021-10-19
Supplement: jcbn21-21sf01.pdf [file jcbn21-21sf01.pdf]

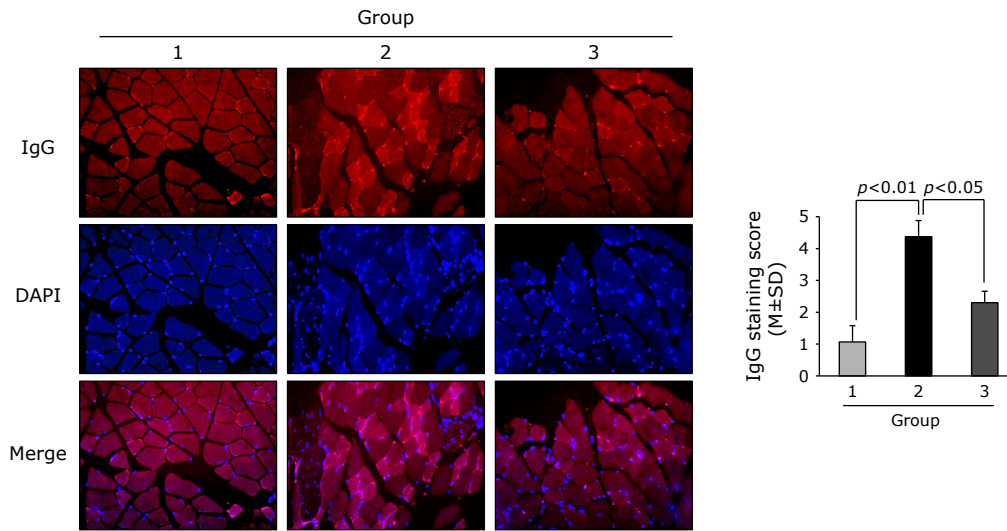

**Supplemental Fig. 1.** Immunostaining of IgG. Immunostaining of IgG was done with DAPI staining. Group 2 showed intense staining of IgG, while attenuated staining in Group 3, signifying degeneration of muscle was significantly ameliorated in group treated with preemptive adalimumab ( $p < 0.05$ ).  $\times 100$  magnification.
